# Supplementary material for: The Mla pathway in Acinetobacter baumannii has no demonstrable role in anterograde lipid transport
Source: eLife journal article supplement (doi:10.7554/elife.56571), 2020-09-03
Supplement: supp [file elife-56571-supp-v1.zip]

Archive with 15 entries (15 files):
- elife_poa_e56571_Transparent_Reporting_File.docx
- elife_poa_e56571_Figure_1_figure_supplement_1.pdf
- elife_poa_e56571_Figure_1_figure_supplement_2.pdf
- elife_poa_e56571_Figure_1_figure_supplement_3.pdf
- elife_poa_e56571_Figure_2_figure_supplement_1.pdf
- elife_poa_e56571_Figure_2_figure_supplement_2.pdf
- elife_poa_e56571_Figure_5_figure_Supplement_1.pdf
- elife_poa_e56571_Figure_6_figure_supplement_1.pdf
- elife_poa_e56571_Figure_6_figure_supplement_2.pdf
- elife_poa_e56571_Figure_6_figure_supplement_3.pdf
- elife_poa_e56571_Supplementary_file_1.docx
- elife_poa_e56571_Supplementary_file_2.docx
- elife_poa_e56571_Supplementary_file_3.docx
- elife_poa_e56571_Supplementary_file_4.docx
- elife_poa_e56571_Supplementary_file_5.docx
