# Supplementary material for: The Mla pathway in Acinetobacter baumannii has no demonstrable role in anterograde lipid transport
Source: eLife journal article supplement (doi:10.7554/elife.56571), 2020-09-03
Supplement: supp [file elife-56571-supp-v1.zip › elife_poa_e56571_Figure_1_figure_supplement_3.pdf]

**A**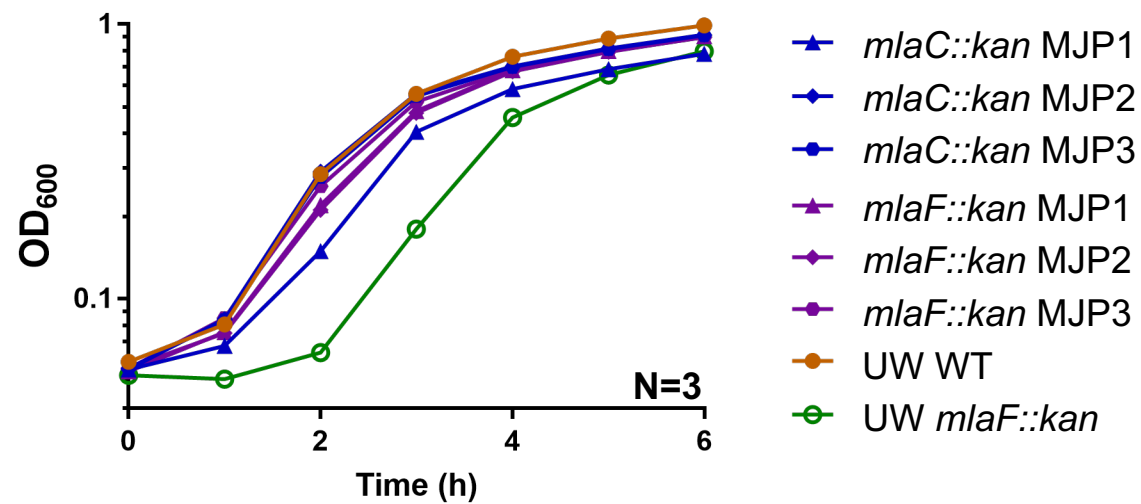**B**

| Genotype        | <i>obgE</i> | Frequency |
|-----------------|-------------|-----------|
| UGA WT          | N258        | 1/1       |
| UGA <i>mlaF</i> | N258        | 1/1       |
| UW WT           | N258I       | 1/1       |
| UW <i>mlaF</i>  | N258I       | 1/1       |
| <i>mlaC</i> MJP | N258        | 12/12     |
| <i>mlaF</i> MJP | N258        | 3/3       |

Figure 1-figure supplement 3
