# Supplementary material for: The Mla pathway in Acinetobacter baumannii has no demonstrable role in anterograde lipid transport
Source: eLife journal article supplement (doi:10.7554/elife.56571), 2020-09-03
Supplement: supp [file elife-56571-supp-v1.zip › elife_poa_e56571_Figure_6_figure_supplement_1.pdf]

|              |                  |                                                              |                                                              |
|--------------|------------------|--------------------------------------------------------------|--------------------------------------------------------------|
| 17978        | UW WT background | UGA WT                                                       | VMADIPGLIEGAAEGAGLGIRFLKHLARTRILLHIIDVQPIDGSDPAHNAKAIMNELAKF |
|              |                  | UGA <i>mlaF::kan</i>                                         | VMADIPGLIEGAAEGAGLGIRFLKHLARTRILLHIIDVQPIDGSDPAHNAKAIMNELAKF |
|              |                  | UW WT                                                        | VMADIPGLIEGAAEGAGLGIRFLKHLARTRILLHIIDVQPIDGSDPAHNAKAIMNELAKF |
|              |                  | UW <i>mlaF::kan</i>                                          | VMADIPGLIEGAAEGAGLGIRFLKHLARTRILLHIIDVQPIDGSDPAHNAKAIMNELAKF |
|              |                  | <i>mlaF::kan</i> MJP1                                        | VMADIPGLIEGAAEGAGLGIRFLKHLARTRILLHIIDVQPIDGSDPAHNAKAIMNELAKF |
|              |                  | <i>mlaF::kan</i> MJP2                                        | VMADIPGLIEGAAEGAGLGIRFLKHLARTRILLHIIDVQPIDGSDPAHNAKAIMNELAKF |
|              |                  | <i>mlaF::kan</i> MJP3                                        | VMADIPGLIEGAAEGAGLGIRFLKHLARTRILLHIIDVQPIDGSDPAHNAKAIMNELAKF |
|              |                  | <i>mlaC::kan</i> MJP1                                        | VMADIPGLIEGAAEGAGLGIRFLKHLARTRILLHIIDVQPIDGSDPAHNAKAIMNELAKF |
|              |                  | <i>mlaC::kan</i> MJP2                                        | VMADIPGLIEGAAEGAGLGIRFLKHLARTRILLHIIDVQPIDGSDPAHNAKAIMNELAKF |
|              |                  | <i>mlaC::kan</i> MJP3                                        | VMADIPGLIEGAAEGAGLGIRFLKHLARTRILLHIIDVQPIDGSDPAHNAKAIMNELAKF |
| A. baumannii | AB5075           | VMADIPGLIEGAAEGAGLGIRFLKHLARTRILLHIIDVQPIDGSDPAHNAKAIMNELAKF |                                                              |
|              | TCDC_AB0715      | VMADIPGLIEGAAEGAGLGIRFLKHLARTRILLHIIDVQPIDGSDPAHNAKAIMNELAKF |                                                              |
|              | 17978            | VMADIPGLIEGAAEGAGLGIRFLKHLARTRILLHIIDVQPIDGSDPAHNAKAIMNELAKF |                                                              |
|              | AB307            | VMADIPGLIEGAAEGAGLGIRFLKHLARTRILLHIIDVQPIDGSDPAHNAKAIMNELAKF |                                                              |
|              | AYE              | VMADIPGLIEGAAEGAGLGIRFLKHLARTRILLHIIDVQPIDGSDPAHNAKAIMNELAKF |                                                              |
|              | ACICU            | VMADIPGLIEGAAEGAGLGIRFLKHLARTRILLHIIDVQPIDGSDPAHNAKAIMNELAKF |                                                              |
|              | 1656             | VMADIPGLIEGAAEGAGLGIRFLKHLARTRILLHIIDVQPIDGSDPAHNAKAIMNELAKF |                                                              |
|              | AB0057           | VMADIPGLIEGAAEGAGLGIRFLKHLARTRILLHIIDVQPIDGSDPAHNAKAIMNELAKF |                                                              |
|              | MDR_Zj06         | VMADIPGLIEGAAEGAGLGIRFLKHLARTRILLHIIDVQPIDGSDPAHNAKAIMNELAKF |                                                              |
|              | 19606            | VMADIPGLIEGAAEGAGLGIRFLKHLARTRILLHIIDVQPIDGSDPAHNAKAIMNELAKF |                                                              |
|              | SDF              | VMADIPGLIEGAAEGAGLGIRFLKHLARTRILLHIIDVQPIDGSDPAHNAKAIMNELAKF |                                                              |
|              | D1279799         | VMADIPGLIEGAAEGAGLGIRFLKHLARTRILLHIIDVQPIDGSDPAHNAKAIMNELAKF |                                                              |
|              | MDR_TJ           | VMADIPGLIEGAAEGAGLGIRFLKHLARTRILLHIIDVQPIDGSDPAHNAKAIMNELAKF |                                                              |
|              | TYTH1            | VMADIPGLIEGAAEGAGLGIRFLKHLARTRILLHIIDVQPIDGSDPAHNAKAIMNELAKF |                                                              |
| *****        |                  |                                                              |                                                              |

258

210

269

258  
↓

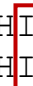

Figure 6-figure supplement 1
