# Supplementary figures and images for: The Mla pathway in Acinetobacter baumannii has no demonstrable role in anterograde lipid transport
Source: eLife journal article supplement (doi:10.7554/elife.56571), 2020-09-03

Gradient : 55/50/45/40/35/30 % (w/w)

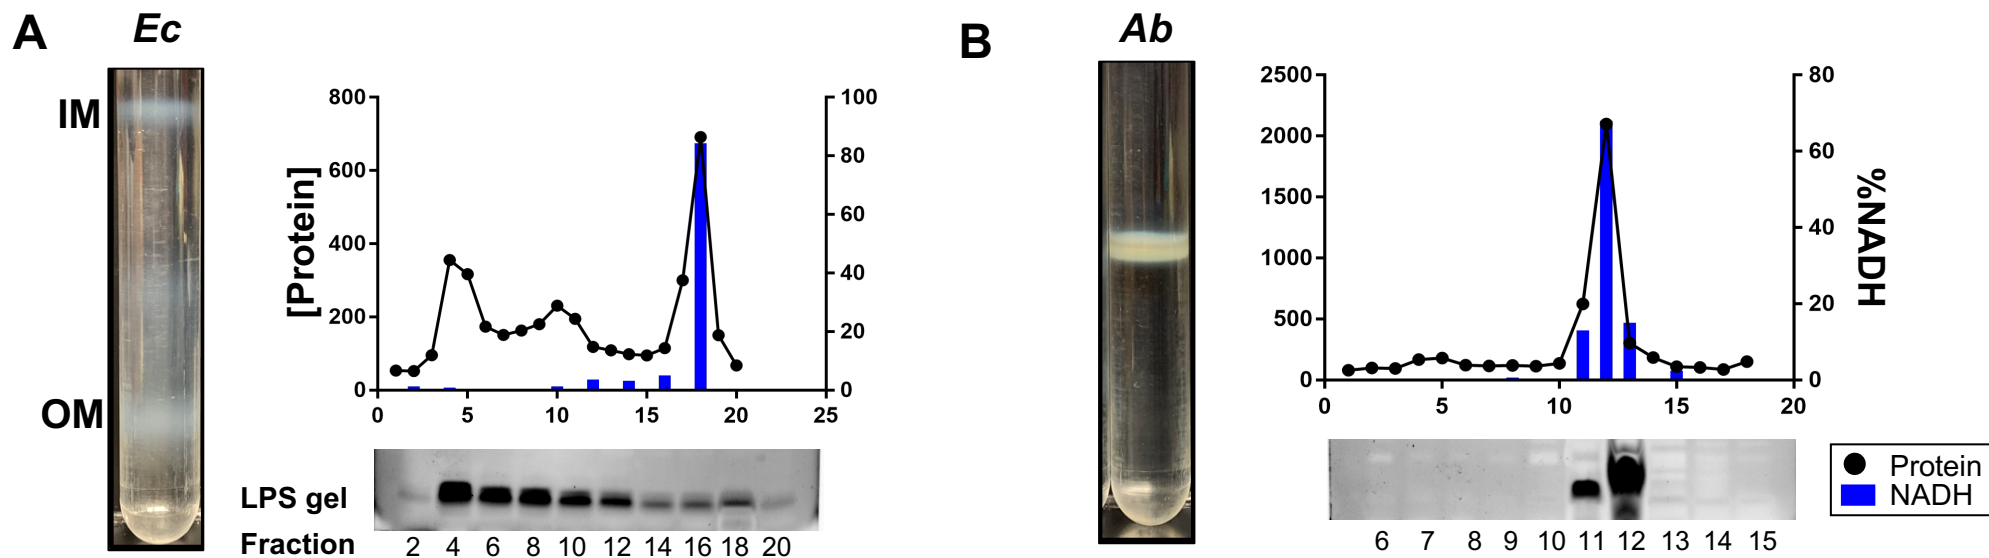

Gradient : 73/53/20 % (w/v)

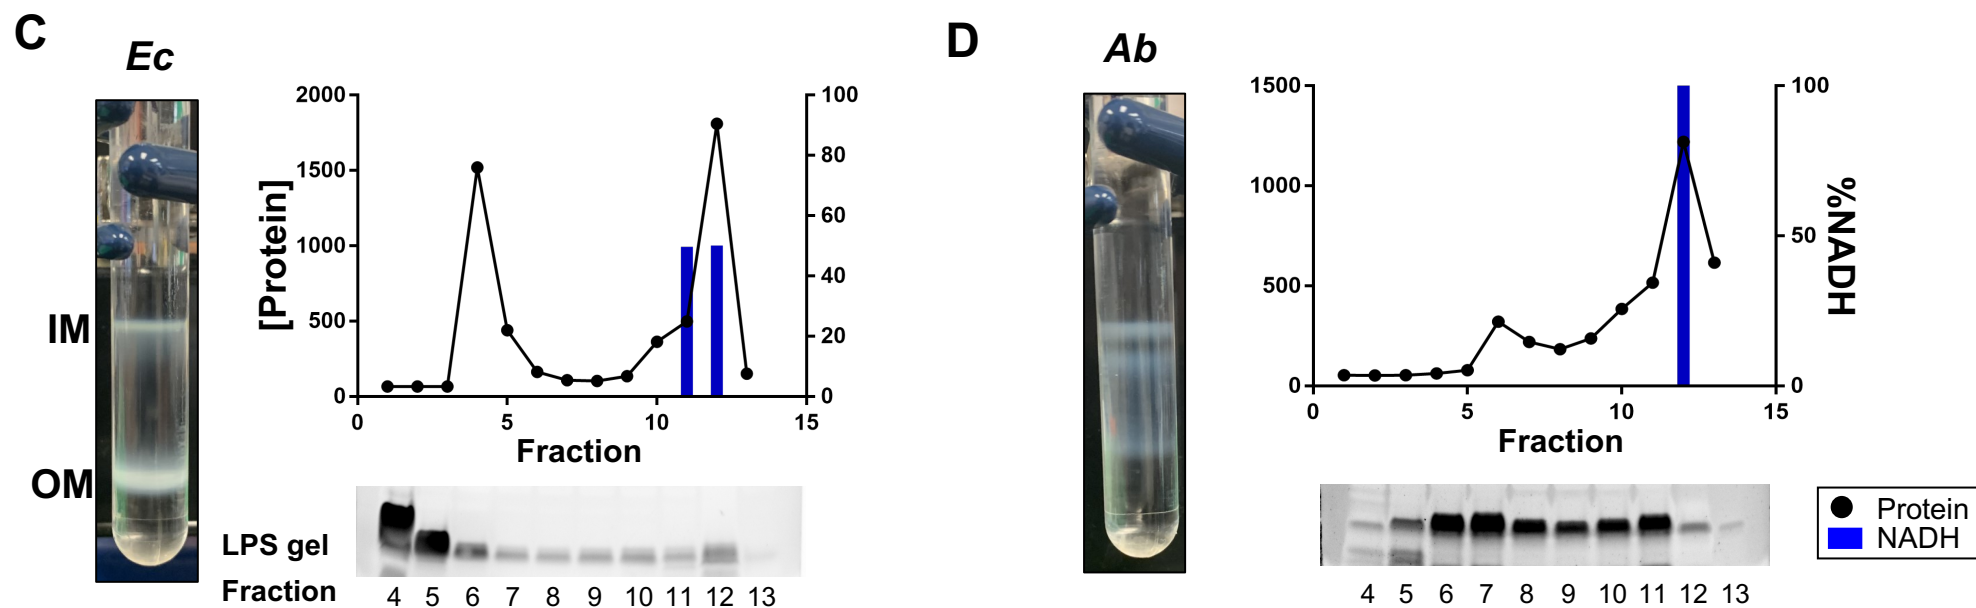

Figure 2-figure supplement 1

Supplement: supp [file elife-56571-supp-v1.zip]

**UGA WT**

**UW WT**

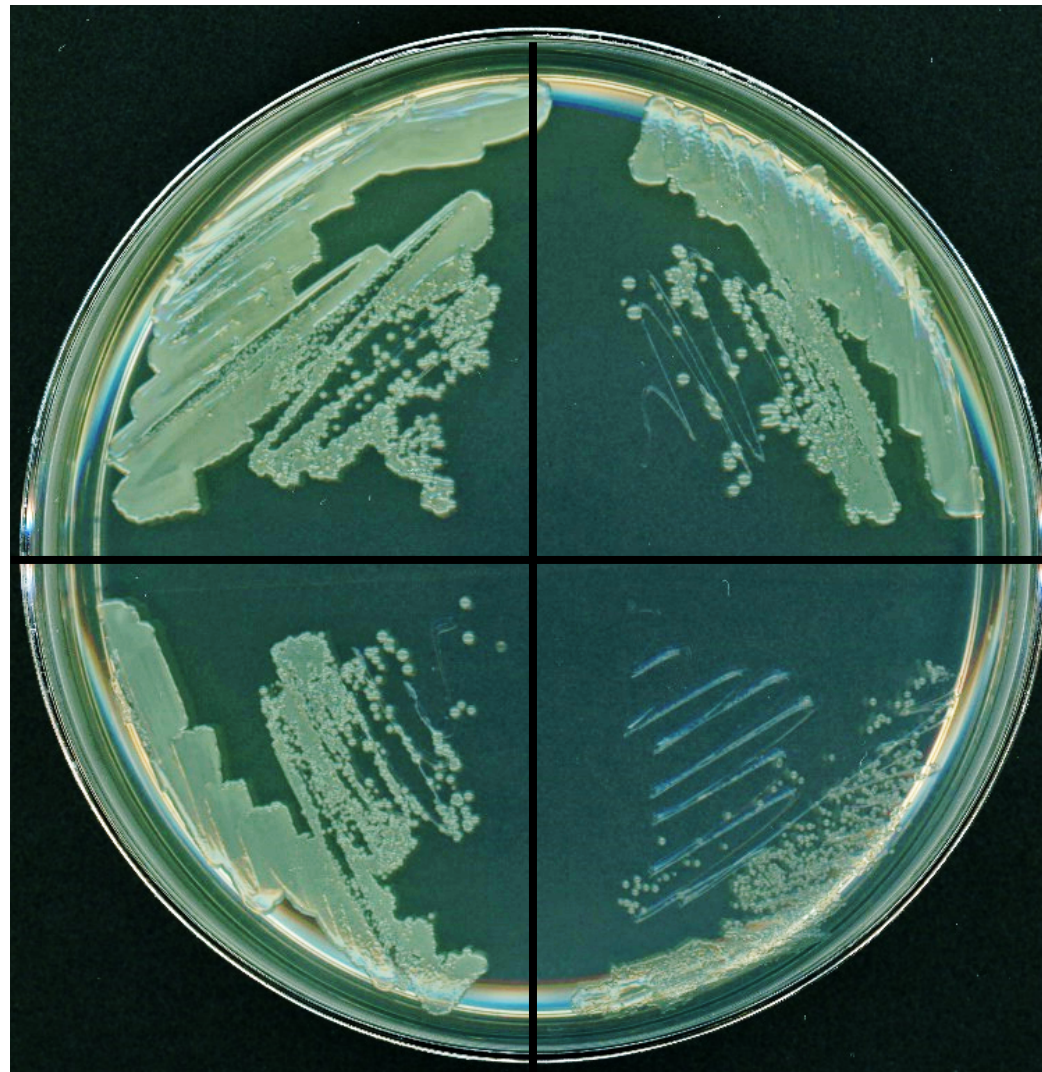

**UGA  $\Delta mlaF$**

**UW  $\Delta mlaF$**

Figure 1-figure supplement 1

Supplement: supp [file elife-56571-supp-v1.zip › elife_poa_e56571_Figure_1_figure_supplement_1.pdf]

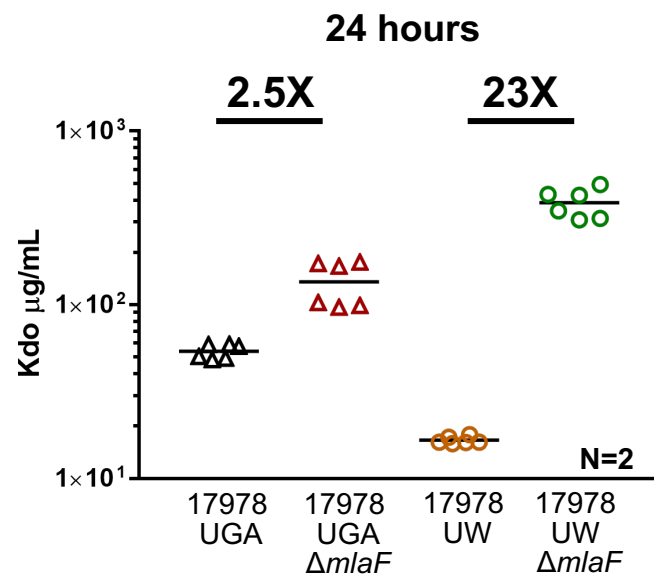

Figure 1-figure supplement 2

Supplement: supp [file elife-56571-supp-v1.zip › elife_poa_e56571_Figure_1_figure_supplement_2.pdf]

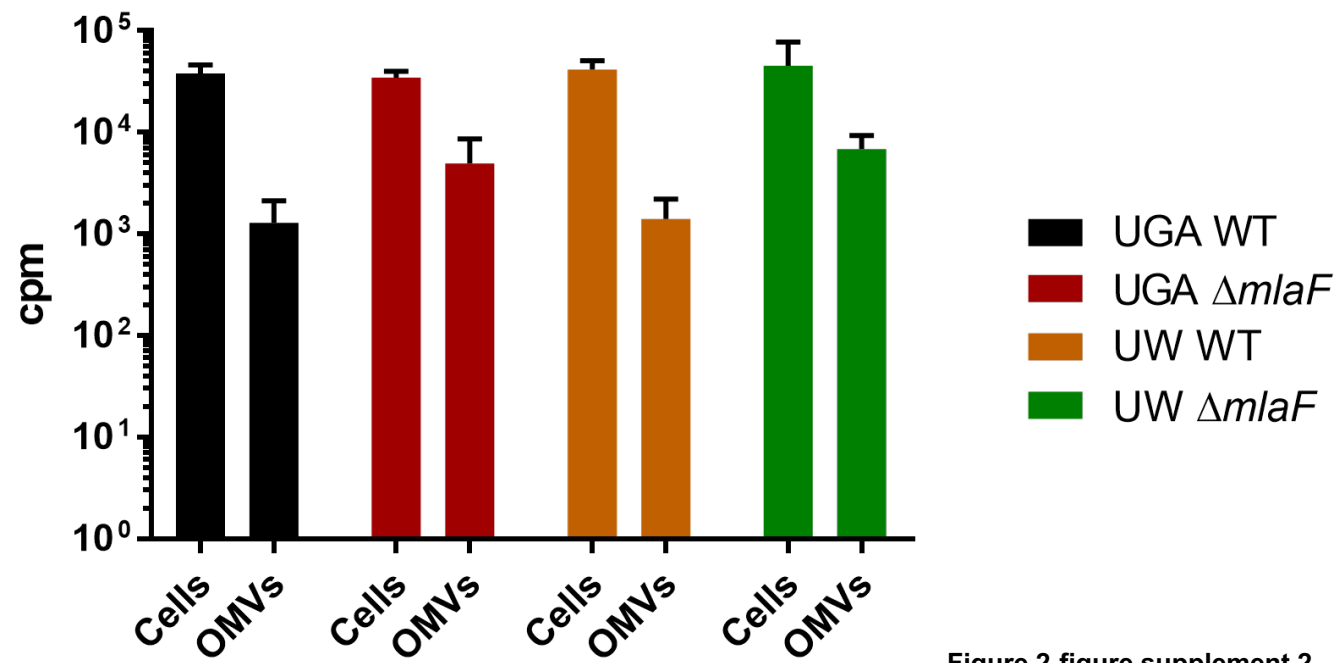

Figure 2-figure supplement 2

Supplement: supp [file elife-56571-supp-v1.zip › elife_poa_e56571_Figure_2_figure_supplement_2.pdf]

**A**

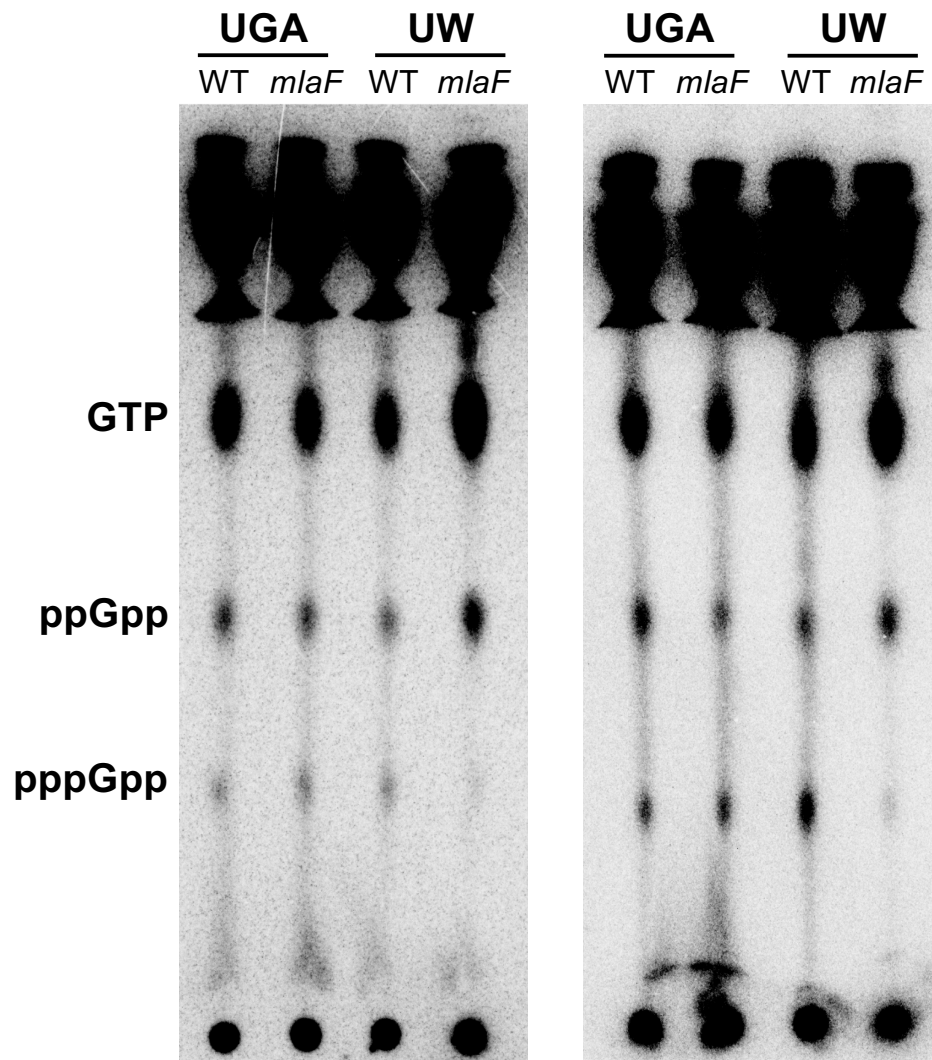

**B**

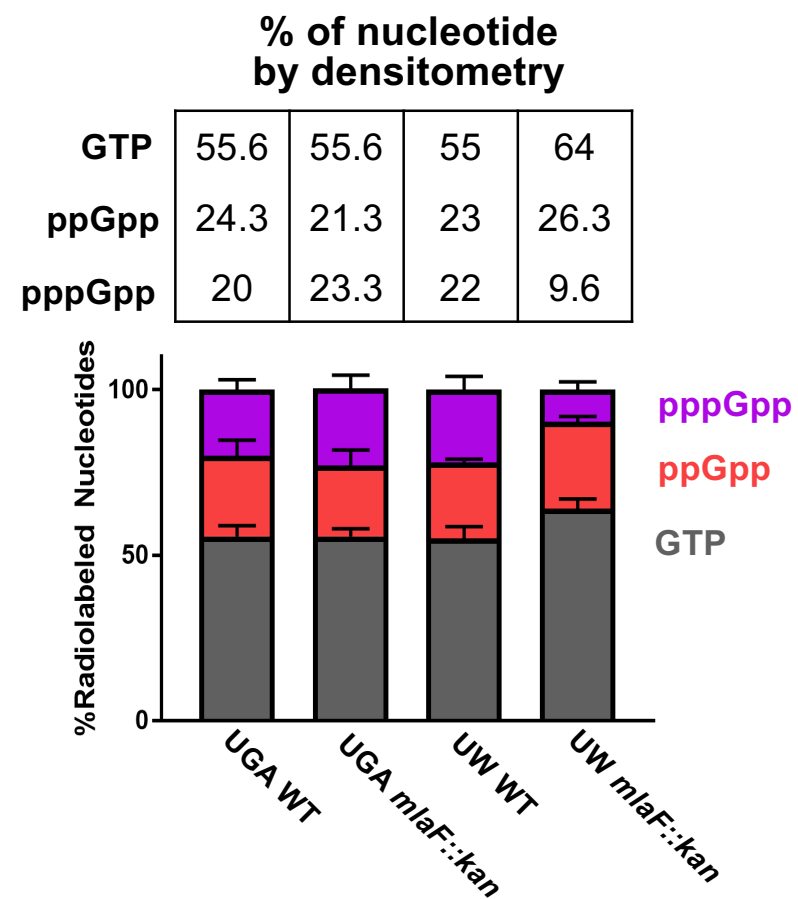

Supplement: supp [file elife-56571-supp-v1.zip › elife_poa_e56571_Figure_5_figure_Supplement_1.pdf]

**A**

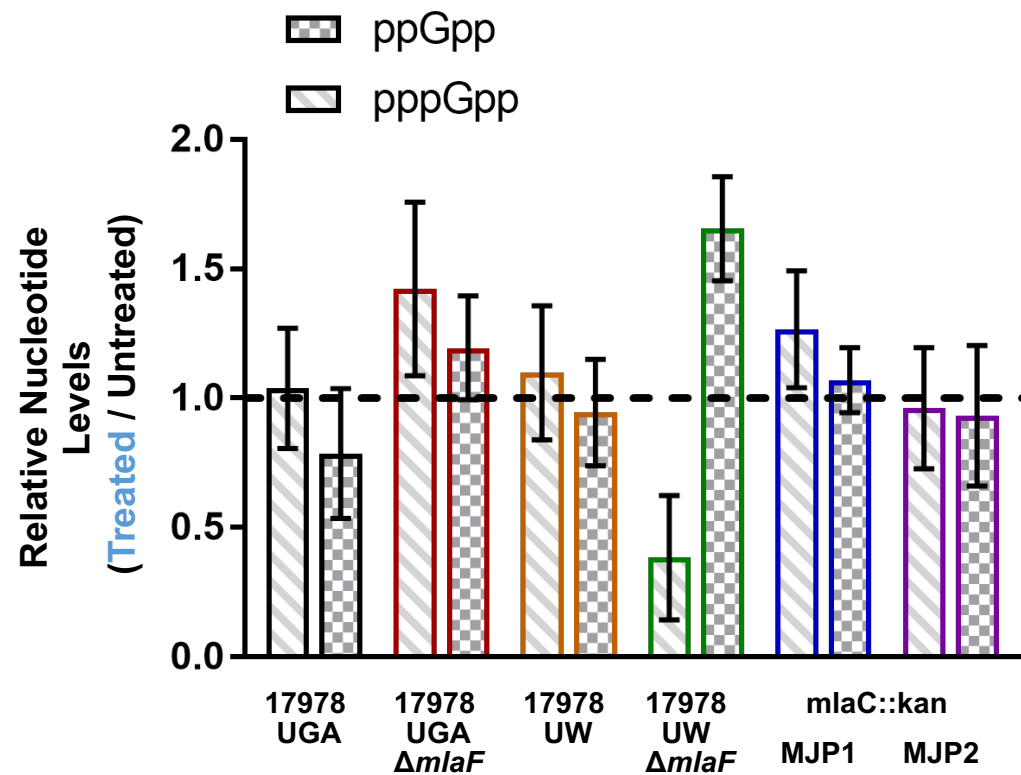

**B**

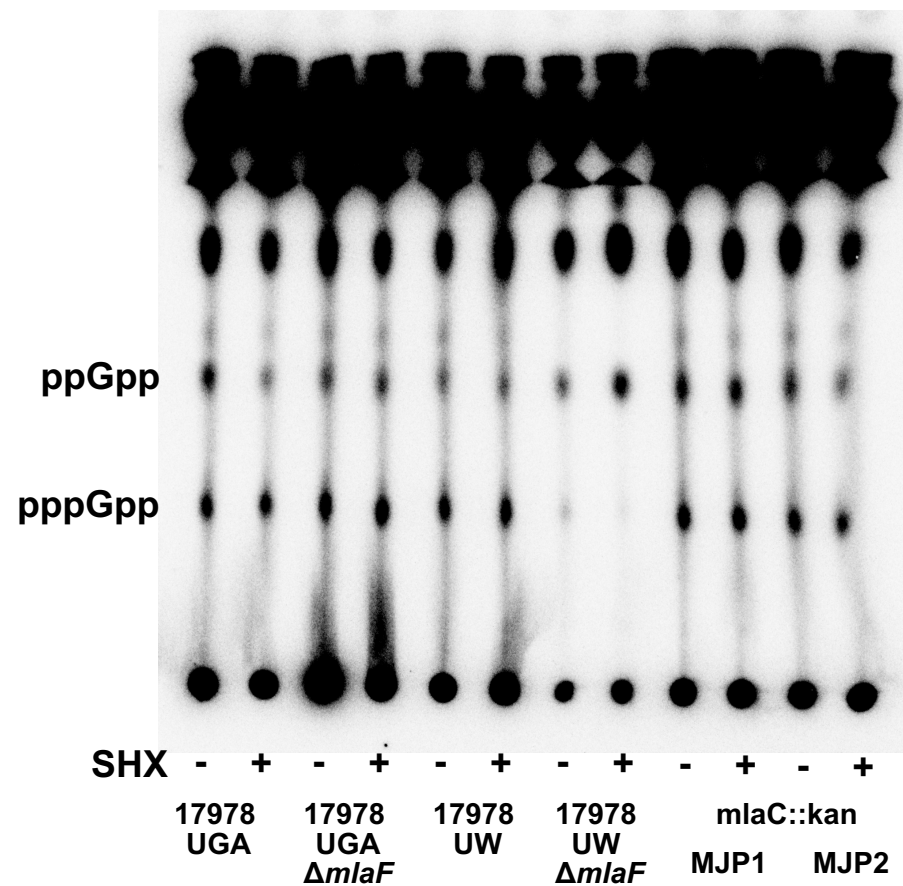

Figure 6-figure supplement 2

Supplement: supp [file elife-56571-supp-v1.zip › elife_poa_e56571_Figure_6_figure_supplement_2.pdf]

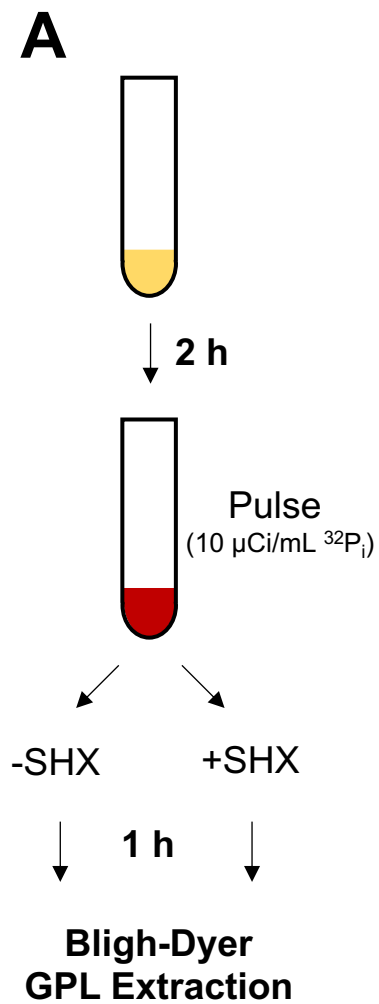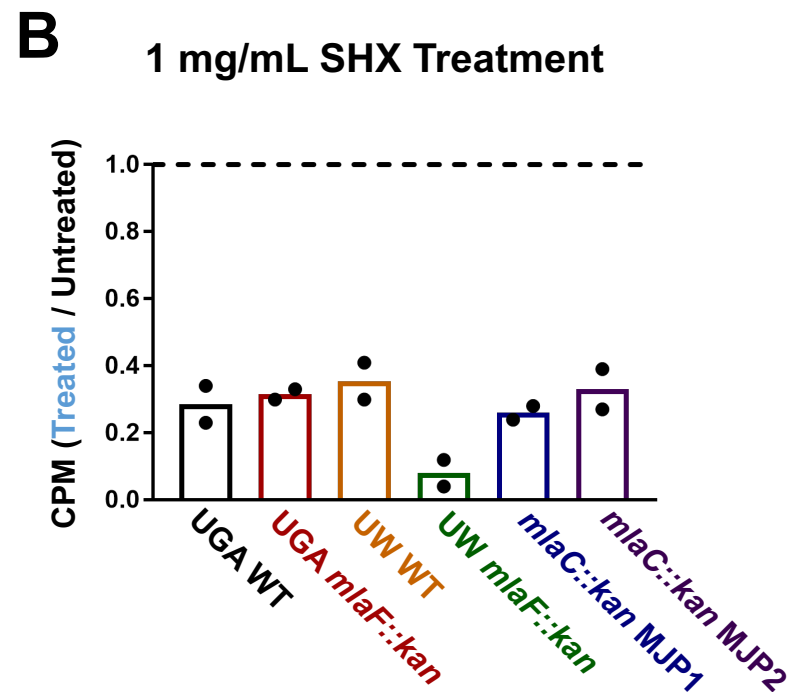

Figure 6-figure supplement 3

Supplement: supp [file elife-56571-supp-v1.zip › elife_poa_e56571_Figure_6_figure_supplement_3.pdf]
